# Supplementary material for: Synergistic Effect of H2O2 and NO2 in Cell Death Induced by Cold Atmospheric He Plasma
Source: PubMed Central journal article supplement (PMC4929573; doi:10.1038/srep29098), 2016-07-01
Supplement: srep29098-s1.pdf [file srep29098-s1.pdf]

# **Synergistic Effect of H<sub>2</sub>O<sub>2</sub> and NO<sub>2</sub> in Cell Death Induced by Cold Atmospheric He**

## **Plasma**

Pierre-Marie Girard<sup>1,2,§</sup>, Atousa Arbabian<sup>3</sup>, Michel Fleury<sup>3</sup>, Gérard Bauville<sup>3</sup>, Vincent Puech<sup>3</sup>,  
Marie Dutreix<sup>1,2</sup>, and Joao Santos Sousa<sup>3,§</sup>

<sup>1</sup> Institut Curie, PSL Research University, CNRS UMR3347, INSERM U1021, 91405, Orsay, France.

<sup>2</sup> Université Paris-Sud, Université Paris-Saclay, rue Georges Clémenceau, 91405 Orsay, France

<sup>3</sup> LPGP, CNRS, Université Paris-Sud, Université Paris-Saclay, 91405 Orsay, France

<sup>§</sup> Corresponding authors: Pierre-Marie Girard, Institut Curie, PSL Research University, CNRS UMR 3347, INSERM U1021, 91405 Orsay, France, pierre-marie.girard@curie.fr. Joao Santos Sousa, LPGP, CNRS, Univ. Paris-Sud, Université Paris-Saclay, 91405 Orsay, joao.santos-sousa@u-psud.fr

**A**

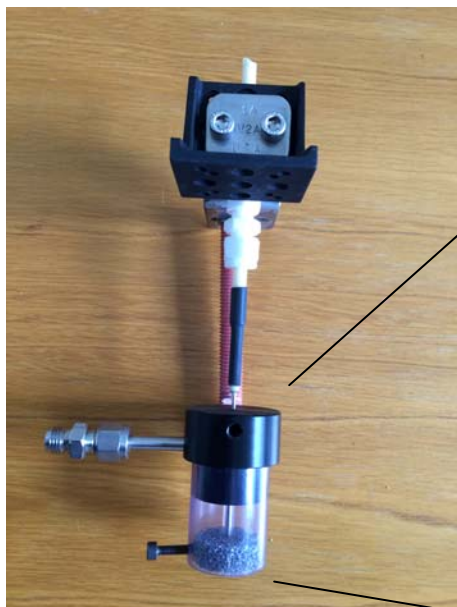

**B**

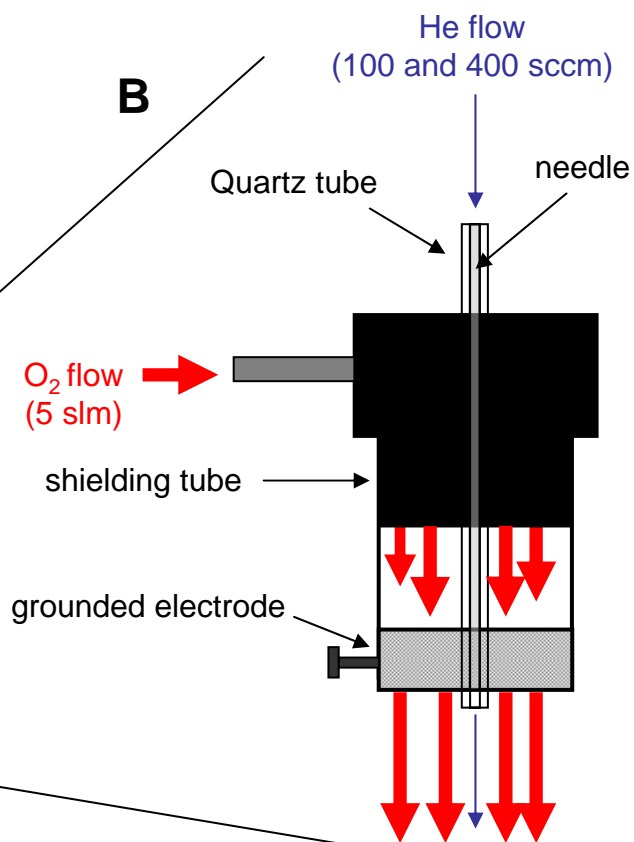

Figure S1

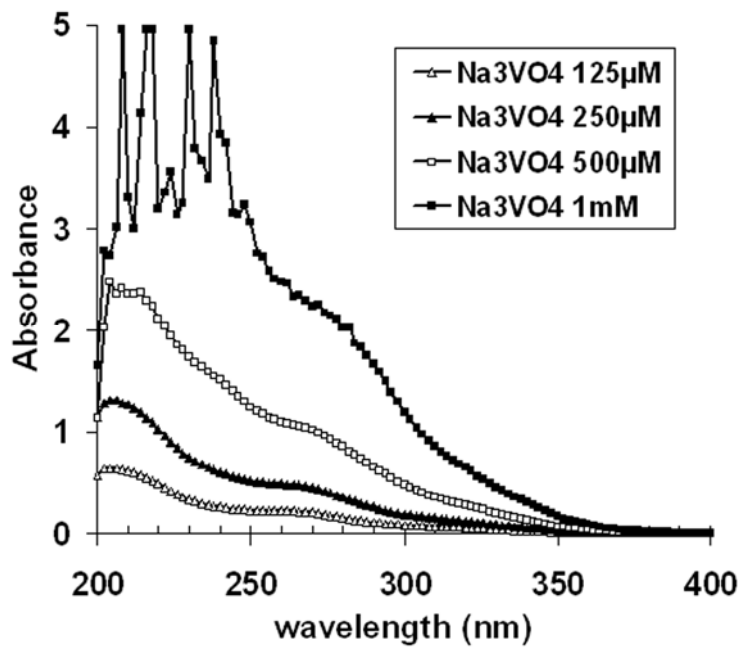

Figure S2

**A**

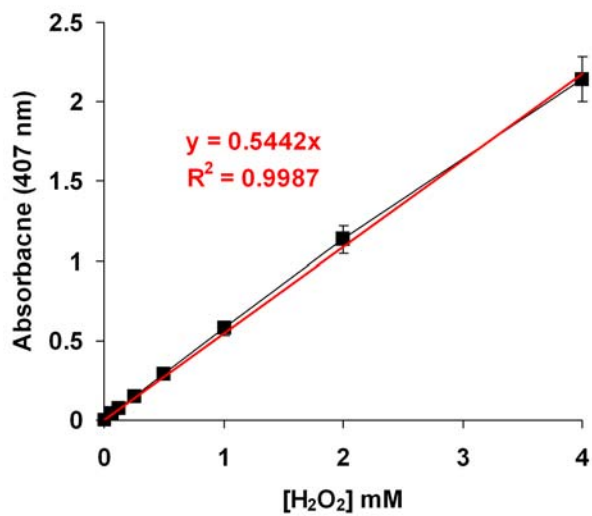

**B**

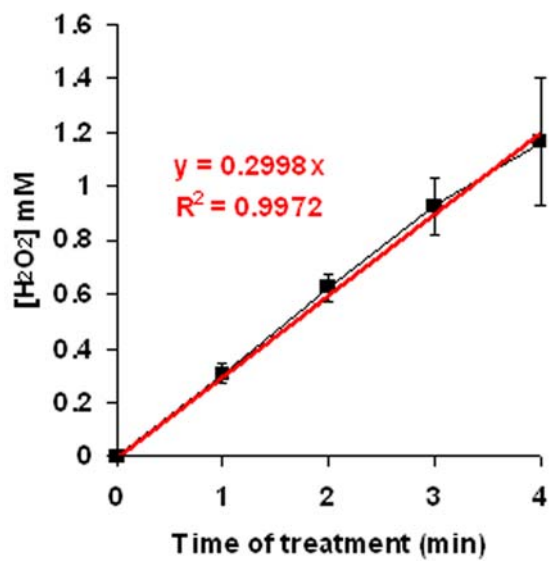

Figure S3

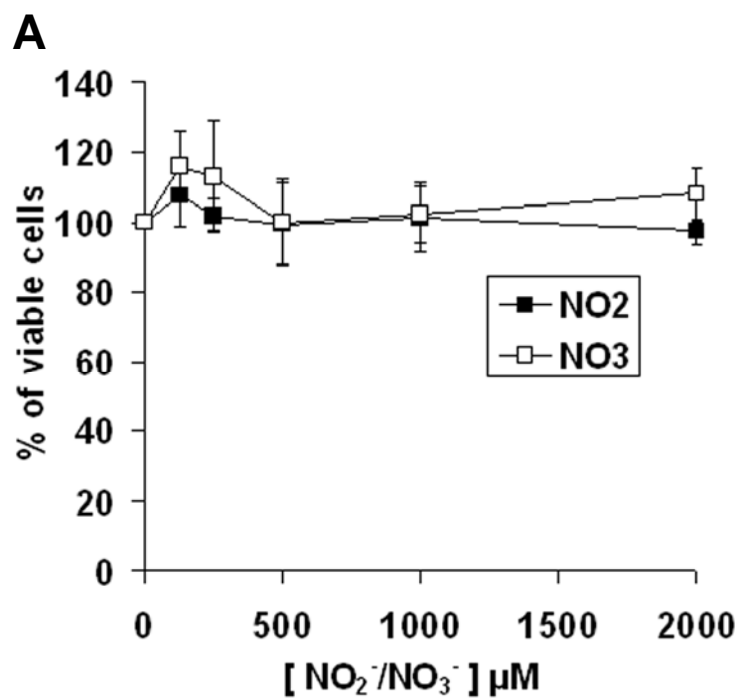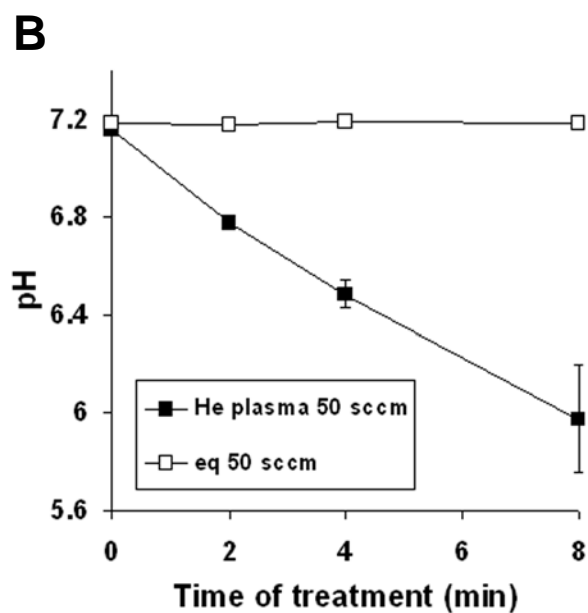

Figure S4

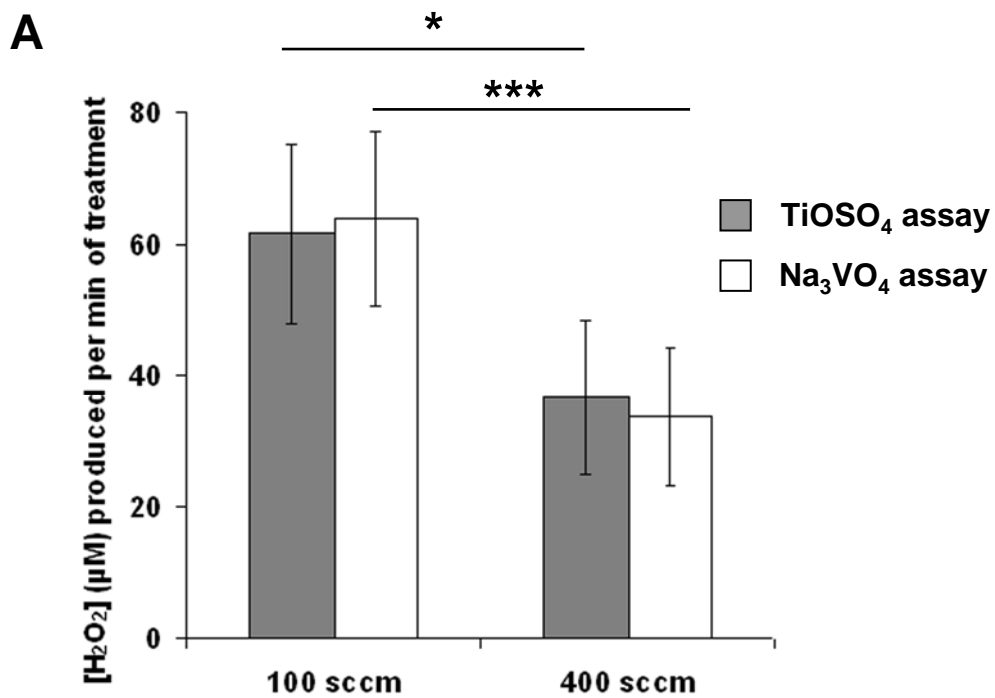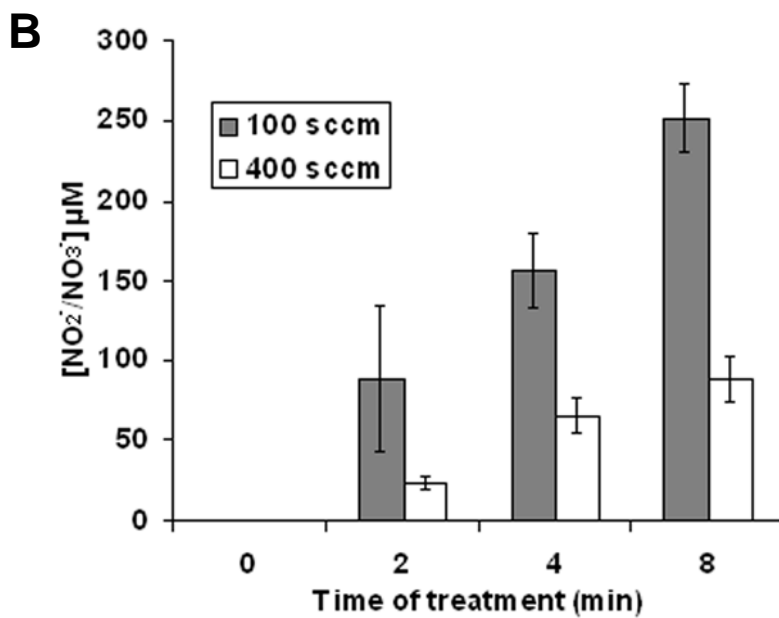

Figure S5

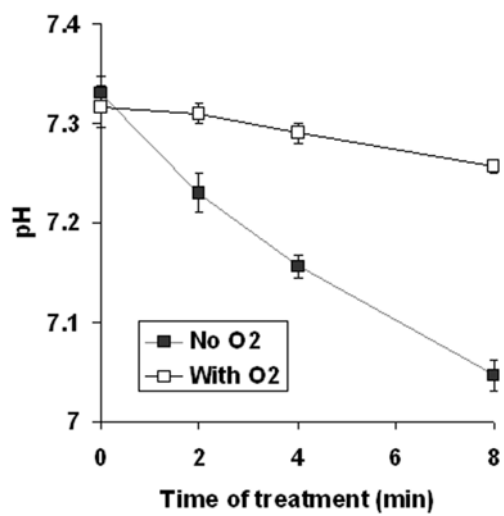

Figure S6

## Supplementary Figure Legend

Figure S1. (A) Photograph of the home-made system used to shield the He flow from ambient air. (B) Schematic representation of the system. The external diameter of the needle is 1.6mm; the internal diameter of the needle is 1.10mm; the external diameter of the quartz tube is 4.30mm; the internal diameter of the quartz tube is 1.60mm; and the external diameter of the shielding tube is 32mm. The distance between the grounded electrode and the ending of the quartz tube is 5 mm.

Figure S2. Optical densities in the UV range (from 200 nm to 400 nm) of increasing concentrations of  $\text{Na}_3\text{VO}_4$  diluted in  $\text{PBS}(\text{Ca}^{2+}/\text{Mg}^{2+})$ . The spectra were recorded on a double beam spectrophotometer (UVIKON XS, SECOMAM®, Servilab, France).

Figure S3. (A) Increasing concentrations of  $\text{H}_2\text{O}_2$  were added to solutions of 2%  $\text{TiOSO}_4$  diluted in 3 M  $\text{H}_2\text{SO}_4$ . The absorbance of the solutions at 407 nm was recorded and plotted as a function of the concentration of  $\text{H}_2\text{O}_2$ . The data are the mean  $\pm$  SD of 5 independent experiments. (B) Five hundred microliters of  $\text{PBS}(\text{Ca}^{2+}/\text{Mg}^{2+})$  were exposed for the indicated periods of time to He plasma at a gas flow of 50 sccm. The treated  $\text{PBS}(\text{Ca}^{2+}/\text{Mg}^{2+})$  solutions were mixed to  $\text{TiOSO}_4$  solutions and the absorbances recorded at 407 nm. The concentration of  $\text{H}_2\text{O}_2$  in each condition was then determined using the equation shown in Figure S3A and plotted as a function of treatment time. The data are the mean  $\pm$  SD of 6 independent experiments.

Figure S4. (A) MRC5Vi cells were seeded in 12 well plates and exposed for 1 h to increasing concentration of  $\text{NO}_2^-$  or  $\text{NO}_3^-$  diluted in 500  $\mu\text{l}$  of  $\text{PBS}(\text{Ca}^{2+}/\text{Mg}^{2+})$ . Thereafter, 2.5 ml of



complete medium containing serum were added and the cells incubated in a humidified atmosphere at 37°C / 5% CO<sub>2</sub>. Twenty-four hours later, the cell viability was assessed by a MTT assay. The data are the mean ± SD of 6 and 5 independent experiments for NO<sub>2</sub><sup>-</sup> and NO<sub>3</sub><sup>-</sup>, respectively. **(B)** Five-hundred microliters of PBS(Ca<sup>2+</sup>/Mg<sup>2+</sup>) were set per well in a 12 well plate and exposed to He plasma at a gas flow of 50 sccm for the indicated periods of time. In parallel, 500 µl of PBS(Ca<sup>2+</sup>/Mg<sup>2+</sup>) containing the equivalent expected concentrations of H<sub>2</sub>O<sub>2</sub>/NO<sub>2</sub><sup>-</sup>/NO<sub>3</sub><sup>-</sup> (for each time point) were also set per well. Thereafter, the pH of each solution was taken. The data are the mean ± SD of 3 to 4 independent experiments. For the reconstituted media (labelled “H<sub>2</sub>O<sub>2</sub>/NO<sub>2</sub><sup>-</sup>/NO<sub>3</sub><sup>-</sup> eq 50 sccm”), the error bars lie within the size of the symbols.

Figure S5. **(A)** The concentration of H<sub>2</sub>O<sub>2</sub> produced per minute in 3 ml of PBS(Ca<sup>2+</sup>/Mg<sup>2+</sup>) by a He plasma jet at 100 and 400 sccm (conditions without a shielding gas of oxygen) and at an output voltage of 5.5 kV was determined by the Na<sub>3</sub>VO<sub>4</sub> and TiOSO<sub>4</sub> assays. The data are the mean ± SD of 5 independent experiments for all the assays. Student t-test was used to check the statistical significance (\*p<0.05, \*\*p<0.01, \*\*\*p<0.001). **(B)** In parallel, the concentrations of NO<sub>x</sub> (NO<sub>2</sub><sup>-</sup> + NO<sub>3</sub><sup>-</sup>) were determined using the Griess assay. The data are the mean ± SD of 2 independent experiments.

Figure S6. Three milliliters of PBS(Ca<sup>2+</sup>/Mg<sup>2+</sup>) were set per well in a 12 well plate and exposed to He plasma at a gas flow of 100 sccm in the presence (with O<sub>2</sub>) or absence (no O<sub>2</sub>) of a shielding gas of oxygen for the indicated period of times, and at a output voltage of 5.5 kV. The pH of plasma-treated solutions was measured immediately after the treatment. The data are the mean ± SD of 3 independent experiments.
